# Supplementary material
Source: PubMed Central journal article supplement (PMC4950979)
Supplement: NIHMS791078-supplement-2.pdf [file NIHMS791078-supplement-2.pdf]

## SUPPLEMENTARY MATERIAL

# **A comparative evaluation of treatments with 17 $\beta$ -estradiol and its brain-selective prodrug in a double-transgenic mouse model of Alzheimer's disease**

Anna E. Tschiffely<sup>a,b,‡</sup>, Rosemary A. Schuh<sup>c,d</sup>, Katalin Prokai-Tatrai<sup>e,f</sup>, Laszlo Prokai<sup>e,f,\*</sup> and Mary Ann Ottinger<sup>b,§,\*</sup>

<sup>1</sup>Neuroscience and Cognitive Science Graduate Program, University of Maryland College Park, MD 20742, USA

<sup>2</sup>Department of Animal and Avian Sciences, University of Maryland College Park, MD 20742, USA

<sup>3</sup>Research Service, VAMHCS, Baltimore, MD 210201

<sup>4</sup>Department of Neurology, University of Maryland School of Medicine, Baltimore, MD 21201, USA

<sup>5</sup>Center for Neuroscience Discovery, Institute for Healthy Aging, University of North Texas Health Science Center, Fort Worth, TX 76107, USA

<sup>6</sup>AgyPharma LLC, Mansfield, TX 76063, USA

<sup>‡</sup>Current Address:

Naval Medical Research Center  
503 Robert Grant Ave  
Silver Spring, MD 20910

<sup>§</sup>Current Address:

Department of Biology and Biochemistry  
Division of Research  
University of Houston  
Houston, TX 77204-2015

\*Correspondence: Division of Research, University of Houston, Houston, TX 77204-2015, USA (M.A. Ottinger) and the Center for Neuroscience Discovery, Institute for Healthy Aging, University of North Texas Health Science Center, Fort Worth, TX 76107, USA (L. Prokai) [maotting@central.uh.edu](mailto:maotting@central.uh.edu) (M.A. Ottinger) and [Laszlo.Prokai@unthsc.edu](mailto:Laszlo.Prokai@unthsc.edu) (L. Prokai). These authors share senior authorship.

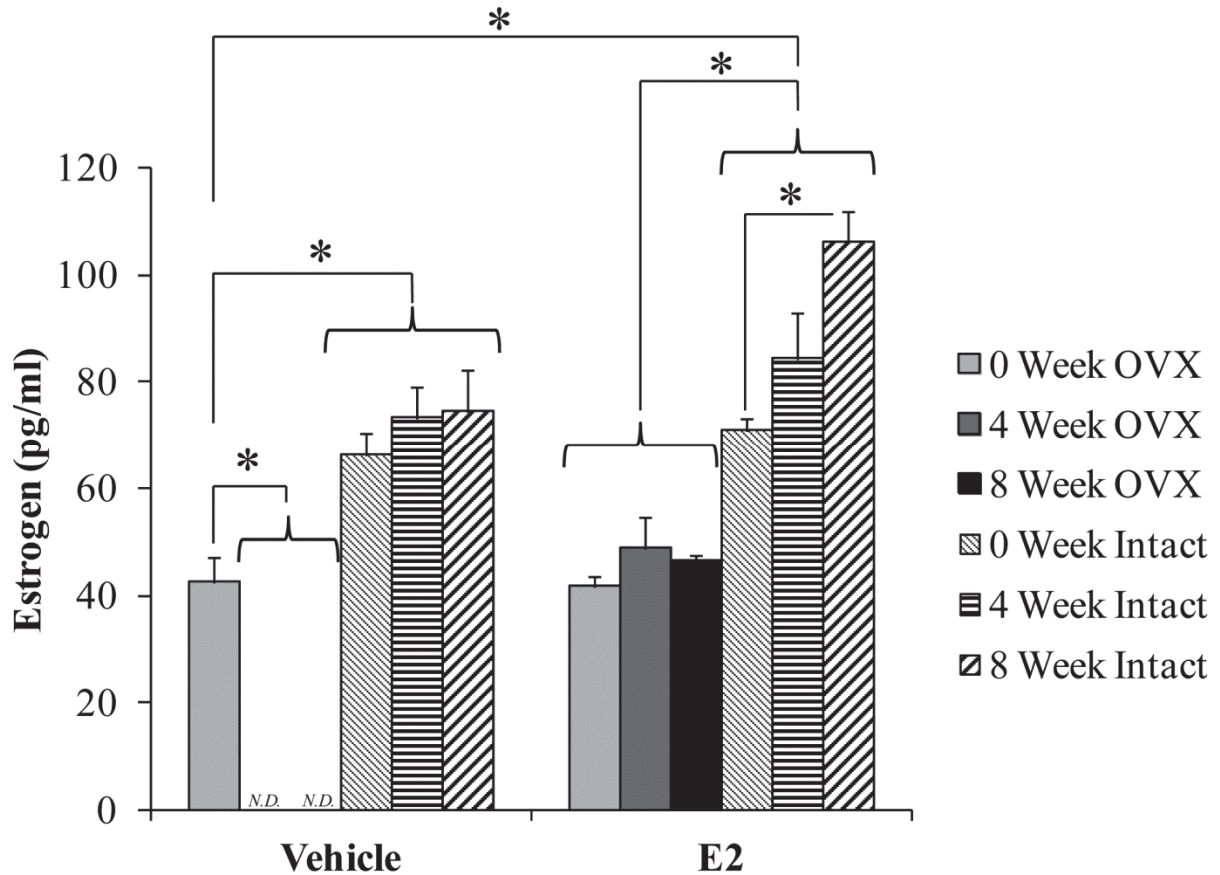

**Fig. S1.** EIA results show successful ovariectomy and re-establishment of serum estrogen levels in OVX female mice through delivering E2 via Alzet osmotic pumps. In intact animals, there was a statistically significant increase of serum estrogen levels after an 8-week continuous delivery of E2. The employed EIA cross-reacted with estrone (12%) and estriol (0.30%), and we noted significant cross-reactivity with DHED; therefore, assay results were only considered for the vehicle and E2 groups. For OVX mice receiving vehicle, serum estrogen below detectable levels at 4 and 8 weeks after starting the experiments (indicated as *N.D.*, not detected). \* $p < 0.05$

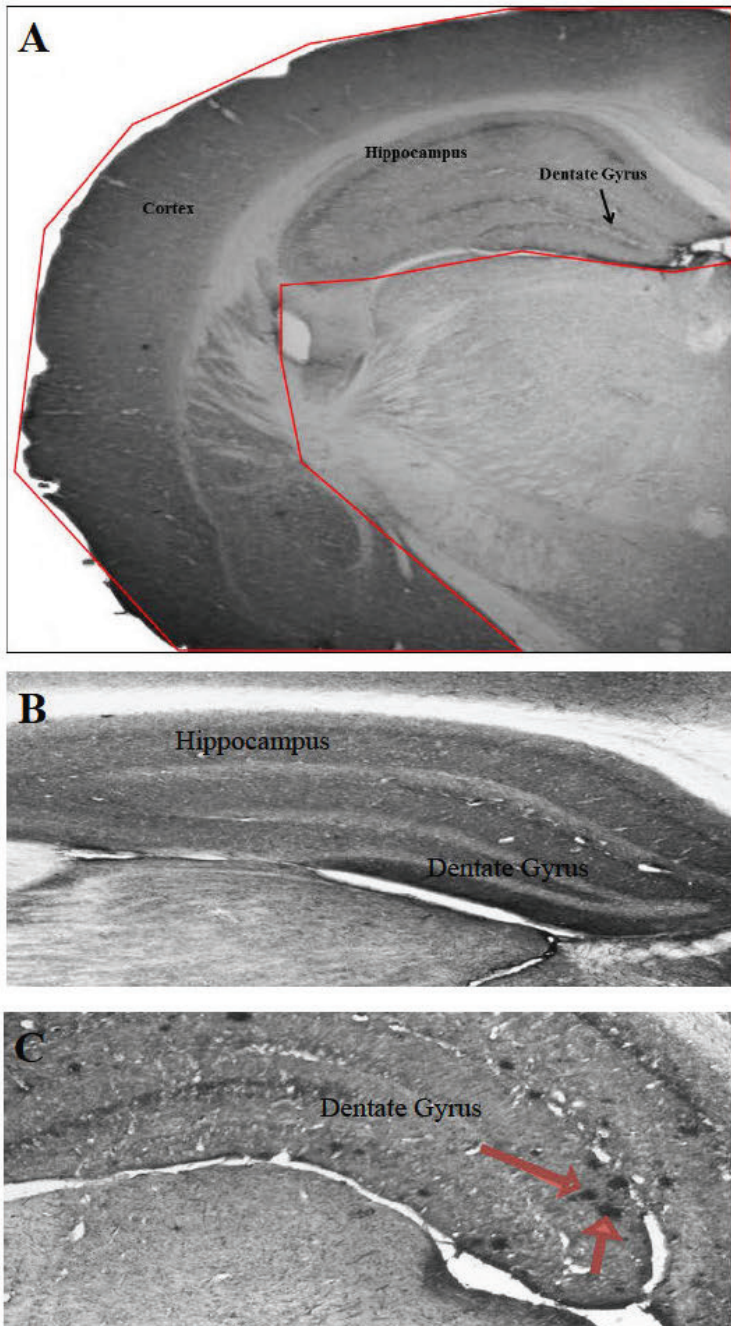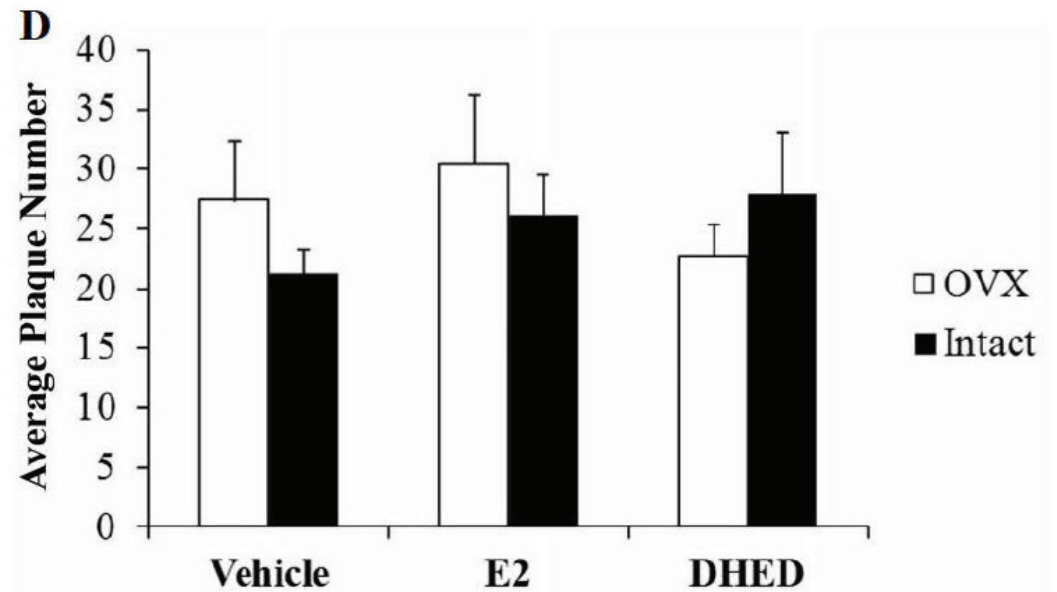

**Fig. S2.** Semi-quantitative measurements of plaque load in the hippocampus and surrounding cortex in DTG mice. (A) The area within the red boundaries was considered for counting plaques; a representative hippocampal/dentate gyrus area of (B) non-transgenic and (C) DTG female mice with red arrows pointing to plaques; (D) average number of plaques ( $\pm$ SEM) counted in the experimental groups involved in our study.

**A**

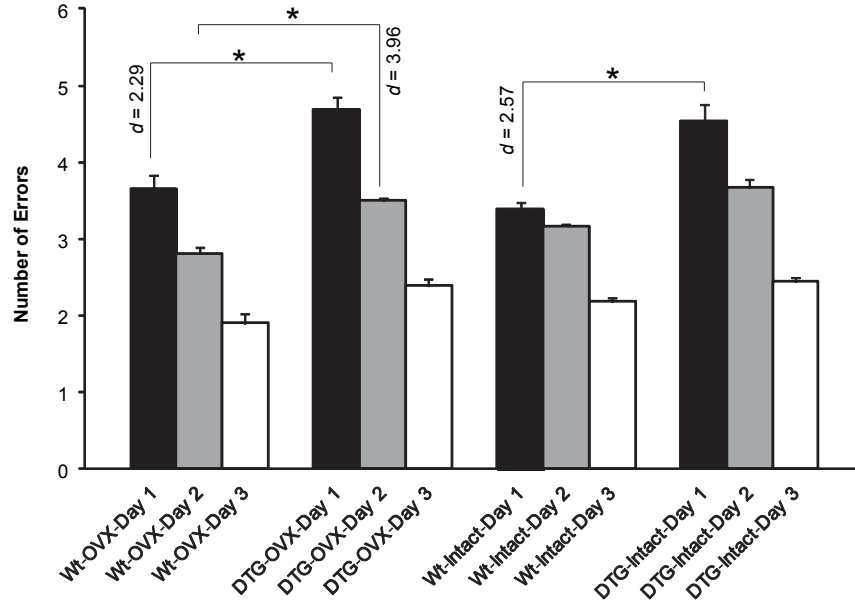

| Genotype            | Genotype       | Difference | p      | 95% Confidence Interval |       |
|---------------------|----------------|------------|--------|-------------------------|-------|
|                     |                |            |        | Lower                   | Upper |
| APPswe/PS1dE9 (DTG) | Wild-type (Wt) | 0.686      | <0.001 | 0.550                   | 0.821 |

**B**

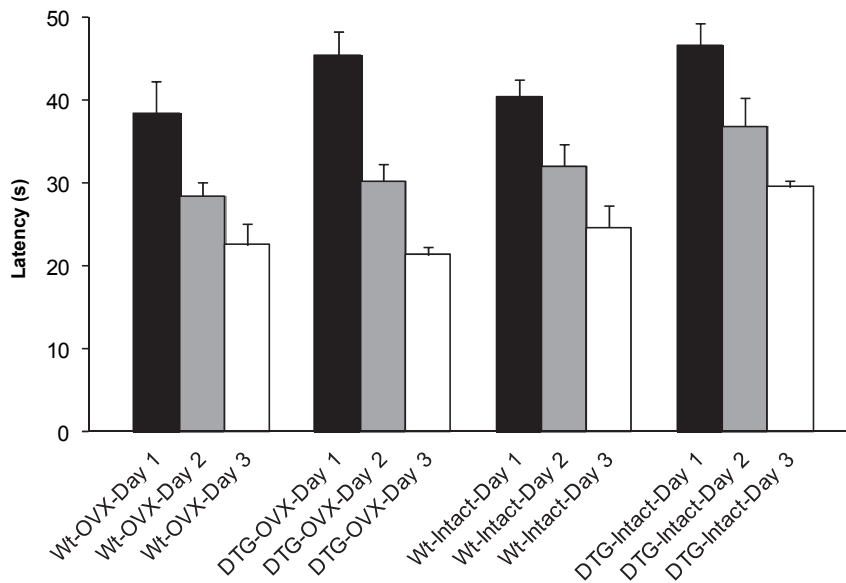

| Genotype            | Genotype       | Difference (s) | p     | 95% Confidence Interval (s) |       |
|---------------------|----------------|----------------|-------|-----------------------------|-------|
|                     |                |                |       | Lower                       | Upper |
| APPswe/PS1dE9 (DTG) | Wild-type (Wt) | 3.9            | 0.008 | 1.1                         | 6.8   |

**Fig. S3** (preceding page). Statistically significant behavioral deficit upon RAWM testing at 8 months of age manifested in female APP<sup>swe</sup>/PS1<sup>dE9</sup> double-transgenic (DTG) mice compared to wild-type (Wt) females. **(A)** By counting errors, statistically significant main effect of the APP<sup>swe</sup>/PS1<sup>dE9</sup> transgene introduction ( $F_{(1,72)}=101.6$ ;  $p<0.001$ ;  $\eta_p^2=0.585$ ), as well as genotype x trial ( $F_{(2,72)}=9.44$ ;  $p<0.001$ ;  $\eta_p^2=0.208$ ) and ovarian status x trial ( $F_{(2,72)}=4.52$ ;  $p=0.014$ ;  $\eta_p^2=0.112$ ) interactions were shown by factorial analysis—in addition to detecting the obvious main effect of trials ( $F_{(2,72)}=244.8$ ;  $p<0.001$ ;  $\eta_p^2=0.872$ ). *Post hoc* Tukey tests revealed statistically significant differences ( $*p<0.05$ ) in the number of errors between both OVX and intact DTG *versus* Wt animals (Effect sizes were shown by Cohen's *d* values). Studies involving 6 treatment groups would reach statistical power of 0.8 ( $\alpha=0.05$ ; minimum detectable difference of 0.686; standard deviation of residuals: 0.31, estimated from this experiment) with  $N=7$ /group. **(B)** Albeit measuring latencies revealed main effects of the AD transgenes, ovarian status and trials without interaction of these factors, *post hoc* Tukey tests did not reveal statistically significant differences with  $N=7$ /group. Also, statistical power of 0.8 ( $\alpha=0.05$ ; minimum detectable difference of 3.9 s; standard deviation of residuals: 6.6 s, estimated from this experiment) would be reached only with a large number of animals ( $N>70$ /group). Therefore, we evaluated number of errors made by the DTG animals ( $N\geq 7$ /treatment group) in the RAWM testing during the study reported here.
